# Supplementary material for: Stochastic pharmacodynamics of a heterogeneous tumour-cell population
Source: Research Square preprint supplement (doi:10.21203/rs.3.rs-3976948/v1), 2024-02-27
Supplement: Supplementary file 1 [file a6252c4a0011a5aaf30ae48e.pdf]

# Stochastic pharmacodynamics of a heterogeneous tumour-cell population - Supplementary

Van Thuy Truong<sup>1,2</sup>, Paolo Vicini<sup>3</sup>, James Yates<sup>4</sup>, Vincent Dubois<sup>2</sup> and Grant Lythe<sup>1</sup>

<sup>1</sup>School of Mathematics, University of Leeds, Leeds LS2 9JT, UK.

Clinical Pharmacology and Quantitative Pharmacology, AstraZeneca, Granta Park, Cambridge, CB21 6GH, UK.

<sup>3</sup> Confo Therapeutics, Technologiepark 94, 9052 Ghent (Zwijnaarde), Belgium.

<sup>4</sup> DMPK, IVIVT, RD Research, GSK, Gunnels Wood Road, Stevenage, Hertfordshire, SG1 2NY, United Kingdom.

21st February 2024

## 1 Non-constant death rate

We use (??) with

$$w_1(k) = \max\{\mu(1 - 4k), 0\}. \quad (1)$$

Thus a cell's survival probability is a function of its initial regulator value, given by

$$\begin{aligned} s_1(t, k) &= \exp\left(-\mu \int_{t_k}^t (1 - 4k(s)) ds\right) \\ &= \exp\left(-\mu(t - t_k - \frac{4k}{\delta}(1 + e^{-\delta(t-t_k)}))\right). \end{aligned} \quad (2)$$

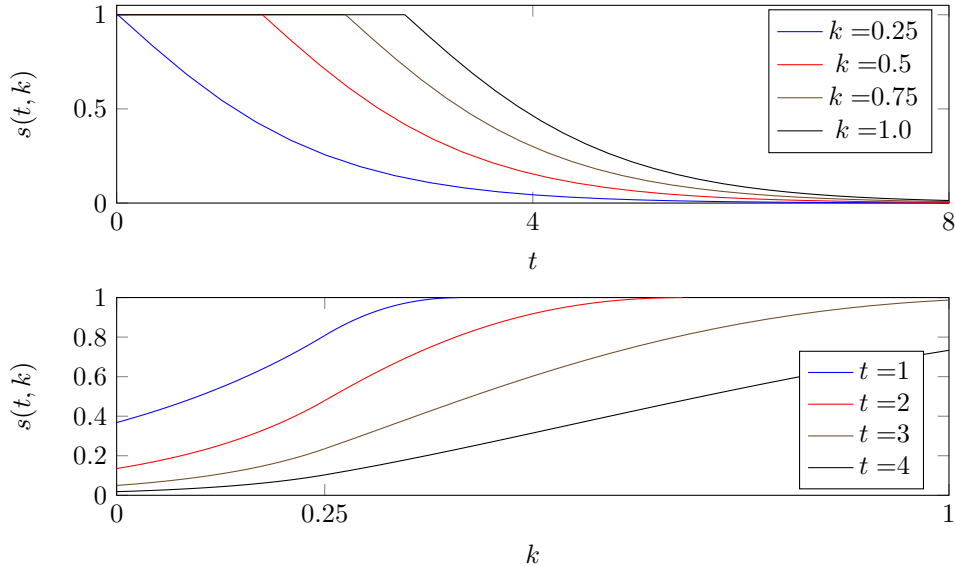

Figure 1: Upper: each line is fixed  $k$  and  $s(t, k)$  is the probability that a cell, whose initial regulator value  $k_i(0)$  is equal to  $k$ , is still alive at time  $t$ . Lower: each line is fixed  $t$  and shows the probability that a cell, whose initial regulator value is  $k$ , is still alive. The formula used is (2), with  $\mu = 1$  and  $\delta = 0.5$ .

As  $\delta t \rightarrow \infty$ ,

$$s_1(t, k) \rightarrow \begin{cases} e^{-\mu t} e^{4k\mu/\delta} & k \leq \frac{1}{4} \\ e^{-\mu t} (4k)^{\mu/\delta} e^{\mu/\delta} & k > \frac{1}{4}. \end{cases} \quad (3)$$

Thus

$$S_1(t) = \int_0^1 s_1(t, k) dk \rightarrow A_1 e^{-\mu t} \quad \text{as } \delta t \rightarrow \infty, \quad (4)$$

where

$$A_1 = e^{\mu/\delta} \frac{4^{\mu/\delta} - \frac{1}{4}}{1 + \frac{\mu}{\delta}} + \frac{\delta}{4\mu} (e^{\mu/\delta} - 1). \quad (5)$$

## 2 Estimate of critical value

Given  $\lambda$ ,  $T$  and  $T_d$ , what is the minimum value of  $\mu$  necessary to guarantee eventual extinction? Figure 2 summarises numerical results at different values of  $\mu$ . Blue dots represent the mean number of cells still alive after 100 cycles of dose and recovery. If  $\mu$  is sufficiently large then the mean number of cells is small (and all cells are eliminated in some realisations). At smaller values of  $\mu$ , the population grows in the long run. In a deterministic model, there is a sharp transition between behaviours in the late-time limit. In a stochastic model, the probability of extinction is non-zero even when  $\mu$  is below the threshold. In both cases, the greater the number of doses, the sharper the transition appears.

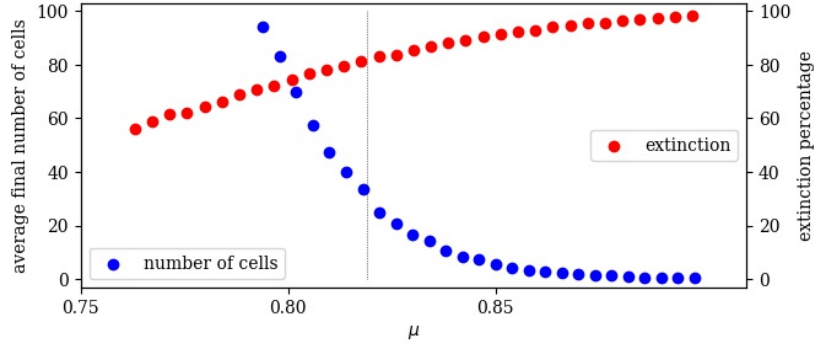

Figure 2: Each blue dot represents the mean number of cells still alive after 100 doses; Each red dot represents the extinction percentage calculated from the same 10000 realisations. The initial number of cells is 100 and the parameter values are  $\lambda = 0.25$ ,  $\alpha = 2$ ,  $\delta = 2.5$ ,  $T = 3$  and  $T_d = 1$ . The dotted vertical line is the estimated value of  $\mu$ , below which ultimate extinction is certain given a sufficient number of doses, calculated using (6).

With these caveats, it is useful to construct an approximation for the critical value of  $\mu$  and examine its parameter dependence. We may estimate the critical value from the relation

$$\mu \times \text{mean time spent in death pool} = \lambda \times \text{mean time spent in division pool}.$$

Applying this relation is not straightforward because it requires knowledge of the distribution of regulator values after many cycles of dose and recovery. We obtain an estimate of  $\mu_c$  by considering the times  $T_1$ ,  $T_2$ ,  $T_3$  and  $T_4$  that characterise entry to and exit from the death and division pools, as shown in Figure 3. Using the approximations given in Figure 3, we estimate that the critical value,  $\mu_c$ , satisfies the condition

$$\mu_c(T_3 - T_2) = \lambda(T_1 + T - T_4) \quad (6)$$

We note, firstly, that  $\mu_c$  is proportional to  $\lambda$ , the division rate of cells when they are in the division pool. Next, we observe that  $\mu_c$  is a decreasing function of  $\delta$  and of  $T_d/T$ . That is, faster-acting drugs, and drugs that are applied for a longer fraction of the total cycle time, kill cancer cells more rapidly. The dependence on the parameter  $\alpha$  that describes the rate of relaxation of regulator values in the recovery periods, is more complicated because speed of recovery affects times spent in both death and division pools.

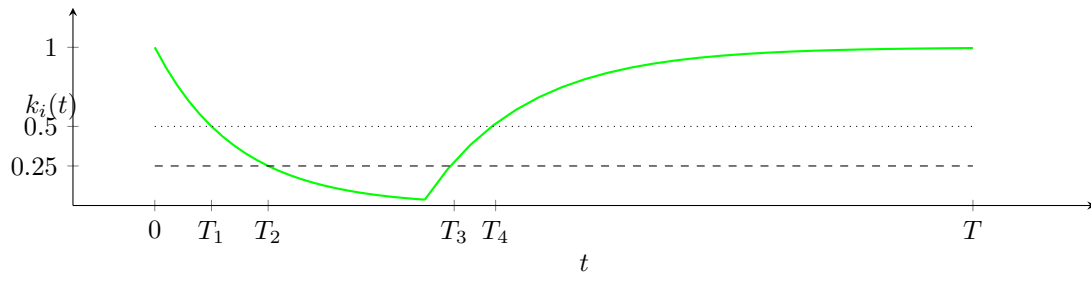

Figure 3: Constructing the approximation. The green line is the regulator value of one cell through one round of dose and recovery. Dotted line:  $k = 0.5$ . Dashed line:  $k = 0.25$ . We use the following approximations:  $T_1 = \frac{1}{\delta} \log 2$ ,  $T_2 = \frac{1}{\delta} \log 4$ ,  $T_3 = T_d + \frac{1}{\alpha} \log \frac{4}{3}$ ,  $T_4 = T_d + \frac{1}{\alpha} \log 2$ .
